# Supplementary material for: Disadvantage in early-life and persistent asthma in adolescents: a UK cohort study
Source: HighWire-hosted journal article supplement (doi:10.1136/thoraxjnl-2021-217312), 2021-10-14
Supplement: thoraxjnl-2021-217312supp001_data_supplement.pdf [file thoraxjnl-2021-217312supp001_data_supplement.pdf]

## Supplementary material

### **S1. Formulas and definitions**

1. Natural direct effect (NDE):  $Y_{a,M(a^*)} - Y_{a^*,M(a^*)}$

This effect is the contrast between the counterfactual outcome if the individual were exposed at  $A = a$ , and the counterfactual outcome if the same individual were exposed at  $A = a^*$ , with the mediator assuming whatever value it would have taken at the reference value of the exposure  $A = a^*$ .

2. Natural Indirect Effect (NIE):  $g(E(Y(a|M(a))) - Y(a|M(a^*)))$

This effect is the contrast, having set the exposure at level  $A = a$ , between the counterfactual outcome if the mediator assumed whatever value it would have taken at a value of the exposure  $A = a$  and the counterfactual outcome if the mediator assumed whatever value it would have taken at a reference value of the exposure  $A = a^*$ .

3. Total Effect (TE):  $g(E(Y(a)) - Y(a^*))$

The sum of the NDE and the NIE, even in presence of exposure-mediator interaction.

**Table S2. Availability of potential mediators by wave**

| Mediators                                    | Wave available |         |                  |
|----------------------------------------------|----------------|---------|------------------|
|                                              | 9 Months       | 3 years | 5 years          |
| <b>1. Perinatal period characteristics</b>   |                |         |                  |
| Maternal pre-pregnancy body mass index (BMI) | x              | n/a     | n/a              |
| Breastfeeding duration                       | x              | n/a     | n/a              |
| Birthweight                                  | x              | n/a     | n/a              |
| Gestation                                    | x              | n/a     | n/a              |
| Maternal smoking during pregnancy            | x              | n/a     | n/a              |
| Alcohol use during pregnancy                 | x              | n/a     | n/a              |
| Ever seen a health professional for wheeze   | ✓              | ✓       | ✓                |
| <b>2. Housing conditions</b>                 |                |         |                  |
| Damp/condensation                            | ✓              | ✓       | ✓                |
| Tenure                                       | ✓              | ✓       | ✓                |
| Furry pets in household                      | x              | ✓       | ✓                |
| Environmental tobacco smoke                  | ✓              | ✓       | ✓                |
| Access to garden                             | ✓              | ✓       | ✓                |
| <b>3. Potential exposure to infection</b>    |                |         |                  |
| Sibling number in household                  | ✓              | ✓       | ✓                |
| Informal vs formal childcare                 | ✓              | ✓       | n/a <sup>a</sup> |
| <b>4. Neighbourhood characteristics</b>      |                |         |                  |
| Volume of traffic                            | x              | ✓       | x                |
| Housing quality                              | x              | ✓       | x                |
| Rubbish on pavement                          | x              | ✓       | x                |
| Good area                                    | x              | ✓       | ✓                |

<sup>a</sup> Children are in formal childcare/education by 5 years

**Table S3. Characteristics in omitted and analytical samples**

|                                      | Omitted sample <sup>a</sup> | Analytical sample |
|--------------------------------------|-----------------------------|-------------------|
| Asthma phenotype                     |                             |                   |
| Never                                | 73.8                        | 76.8              |
| Transient                            | 10.0                        | 8.0               |
| Persistent                           | 16.2                        | 15.2              |
| Maternal education qualification     |                             |                   |
| Degree plus                          | 4.4                         | 6.4               |
| Diploma                              | 25.4                        | 36.4              |
| A levels                             | 14.1                        | 16.7              |
| GCSE A-C                             | 26.9                        | 26.1              |
| GCSE D-G                             | 8.7                         | 6.1               |
| None                                 | 20.5                        | 8.3               |
| Child's sex                          |                             |                   |
| Female                               | 48.2                        | 49.4              |
| Maternal age at birth                |                             |                   |
| 14-24 years                          | 32.7                        | 24.2              |
| Maternal ethnicity                   |                             |                   |
| Mixed                                | 2.1                         | 0.7               |
| Indian                               | 2.3                         | 1.8               |
| Pakistani                            | 10.5                        | 3.1               |
| Black                                | 5.8                         | 2.6               |
| Other                                | 2.4                         | 1.3               |
| Maternal atopy                       |                             |                   |
| One                                  | 23.1                        | 23.6              |
| Both                                 | 7.1                         | 6.8               |
| Maternal pre-pregnancy BMI           |                             |                   |
| Underweight                          | 5.4                         | 4.4               |
| Overweight                           | 27.8                        | 25.7              |
| Obese                                | 14.5                        | 13.0              |
| Breastfeeding at least 3 months      |                             |                   |
| Yes                                  | 79.3                        | 74.6              |
| Child's birth weight                 |                             |                   |
| Healthy weight                       | 8.6                         | 6.0               |
| Gestational age at birth             |                             |                   |
| Preterm                              | 7.4                         | 6.7               |
| Maternal Smoking in pregnancy        |                             |                   |
| Yes                                  | 35.8                        | 35.1              |
| Alcohol consumption during pregnancy |                             |                   |
| Any unit per week                    | 7.8                         | 10.3              |
| Wheeze at 9 months                   |                             |                   |
| Yes                                  | 4.8                         | 3.6               |
| Damp in the house                    |                             |                   |
| Yes                                  | 16.1                        | 14.4              |

**Table S3. (continued) Characteristics in omitted and analytical samples**

|                             | Omitted sample <sup>a</sup> | Analytical sample |
|-----------------------------|-----------------------------|-------------------|
| Tenure                      |                             |                   |
| Own mortgage                | 40.3                        | 60.0              |
| Part rent/mortgage          | 0.3                         | 0.5               |
| Local authority             | 30.0                        | 16.3              |
| Housing association         | 9.7                         | 6.8               |
| Privately rented            | 11.0                        | 7.9               |
| Living with parents         | 4.2                         | 4.1               |
| Rent free                   | 0.8                         | 1.0               |
| Furry pets                  |                             |                   |
| Yes                         | 35.6                        | 41.0              |
| Environmental tobacco smoke |                             |                   |
| Yes                         | 22.4                        | 17.8              |
| Garden access               |                             |                   |
| Yes, shared                 | 5.5                         | 3.5               |
| No                          | 19.2                        | 10.1              |
| Sibling number              |                             |                   |
| 1                           | 40.1                        | 47.7              |
| 2 or more                   | 38.0                        | 27.5              |
| Childcare                   |                             |                   |
| Formal                      | 7.1                         | 13.9              |
| Condition of buildings      |                             |                   |
| Fair condition              | 52.8                        | 38.3              |
| Poor condition              | 8.2                         | 4.8               |
| Bad condition               | 0.8                         | 0.4               |
| Volume of traffic           |                             |                   |
| Light                       | 72.8                        | 75.5              |
| Moderate                    | 17.5                        | 14.8              |
| Heavy                       | 3.4                         | 5.0               |
| Litter in the street        |                             |                   |
| Some                        | 31.3                        | 21.7              |
| Everywhere                  | 3.8                         | 2.0               |
| Good area                   |                             |                   |
| Good                        | 39.4                        | 38.6              |
| Average                     | 23.0                        | 20.9              |
| Poor                        | 8.2                         | 5.1               |
| Very poor                   | 5.8                         | 2.6               |

<sup>a</sup> Omitted samples were still productive in MCS at age 14 but with item missingness (n=1,710)

**Table S4. Univariable relative risk ratios (RRR 95% CI) for transient and persistent asthma by sample characteristics (N=7,487)**

|                                      | Transient RRR | (95% CI)  | Persistent RRR | (95% CI)  |
|--------------------------------------|---------------|-----------|----------------|-----------|
| Maternal education qualification     |               |           |                |           |
| Diploma                              | 0.90          | 0.65 1.24 | 1.08           | 0.82 1.44 |
| A levels                             | 1.00          | 0.69 1.45 | 1.14           | 0.82 1.57 |
| GCSE A-C                             | 1.09          | 0.76 1.56 | 1.29           | 0.95 1.76 |
| GCSE D-G                             | 1.43          | 0.87 2.33 | 1.65           | 1.05 2.58 |
| None                                 | 0.92          | 0.56 1.51 | 1.73           | 1.11 2.69 |
| Child's sex                          |               |           |                |           |
| Female                               | 0.83          | 0.69 0.99 | 0.73           | 0.63 0.85 |
| Maternal age at birth                |               |           |                |           |
| 14-24 years                          | 1.23          | 0.95 1.59 | 1.18           | 0.97 1.43 |
| Maternal ethnicity                   |               |           |                |           |
| Mixed                                | 0.50          | 0.15 1.69 | 0.76           | 0.32 1.81 |
| Indian                               | 0.51          | 0.22 1.19 | 0.93           | 0.56 1.52 |
| Pakistani                            | 0.54          | 0.29 1.01 | 1.13           | 0.86 1.49 |
| Black                                | 0.55          | 0.29 1.06 | 0.96           | 0.58 1.58 |
| Other                                | 0.83          | 0.32 2.17 | 0.59           | 0.29 1.19 |
| Maternal atopy                       |               |           |                |           |
| One                                  | 1.43          | 1.14 1.80 | 1.75           | 1.48 2.07 |
| Both                                 | 1.54          | 1.06 2.25 | 2.63           | 2.03 3.40 |
| Maternal pre-pregnancy BMI           |               |           |                |           |
| Underweight                          | 0.94          | 0.54 1.63 | 1.59           | 1.04 2.43 |
| Overweight                           | 1.26          | 0.98 1.61 | 1.17           | 0.98 1.39 |
| Obese                                | 1.26          | 0.93 1.70 | 1.58           | 1.27 1.96 |
| Breastfeeding at least 3 months      |               |           |                |           |
| Yes                                  | 0.82          | 0.64 1.06 | 0.82           | 0.70 0.97 |
| Child's birth weight                 |               |           |                |           |
| Healthy weight                       | 0.77          | 0.50 1.20 | 0.44           | 0.33 0.60 |
| Gestational age at birth             |               |           |                |           |
| Preterm                              | 1.92          | 1.28 2.88 | 2.09           | 1.59 2.74 |
| Maternal Smoking in pregnancy        |               |           |                |           |
| Yes                                  | 1.34          | 1.08 1.66 | 1.29           | 1.09 1.54 |
| Alcohol consumption during pregnancy |               |           |                |           |
| Any unit per week                    | 0.93          | 0.68 1.27 | 1.16           | 0.90 1.50 |
| Wheeze at 9 months                   |               |           |                |           |
| Yes                                  | 2.24          | 1.35 3.72 | 3.04           | 2.10 4.39 |
| Damp in the house                    |               |           |                |           |
| Yes                                  | 0.96          | 0.73 1.28 | 1.45           | 1.17 1.79 |
| Tenure                               |               |           |                |           |
| Own mortgage                         | 2.00          | 1.09 3.67 | 1.27           | 0.86 1.88 |
| Part rent/mortgage                   | 4.93          | 1.55 15.7 | 3.29           | 1.33 8.12 |
| Local authority                      | 2.98          | 1.50 5.94 | 2.27           | 1.47 3.50 |
| Housing association                  | 2.95          | 1.53 5.68 | 1.59           | 0.99 2.54 |
| Privately rented                     | 2.42          | 1.19 4.91 | 1.76           | 1.04 2.96 |

<sup>A</sup>reference category: Never had asthma

**Table S4. (continued) Univariable relative risk ratios (RRR 95% CI) for transient and persistent asthma by sample characteristics (N=7,487)**

|                             | Transient RRR | (95% CI) |       | Persistent RRR | (95% CI) |      |
|-----------------------------|---------------|----------|-------|----------------|----------|------|
| Living with parents         | 2.44          | 0.81     | 7.37  | 1.21           | 0.63     | 2.31 |
| Rent free                   | 2.10          | 0.59     | 7.46  | 1.00           | 0.33     | 3.02 |
| Furry pets                  |               |          |       |                |          |      |
| Yes                         | 1.05          | 0.85     | 1.30  | 0.95           | 0.81     | 1.12 |
| Environmental tobacco smoke |               |          |       |                |          |      |
| Yes                         | 1.03          | 0.78     | 1.35  | 1.02           | 0.81     | 1.28 |
| Garden access               |               |          |       |                |          |      |
| Yes, shared                 | 0.87          | 0.48     | 1.56  | 1.17           | 0.73     | 1.88 |
| No                          | 1.13          | 0.80     | 1.60  | 1.21           | 0.92     | 1.59 |
| Sibling number              |               |          |       |                |          |      |
| 1                           | 1.09          | 0.85     | 1.39  | 0.83           | 0.70     | 1.00 |
| 2 or more                   | 0.99          | 0.75     | 1.31  | 0.82           | 0.66     | 1.02 |
| Childcare                   |               |          |       |                |          |      |
| Formal                      | 0.80          | 0.59     | 1.07  | 0.87           | 0.72     | 1.06 |
| Condition of buildings      |               |          |       |                |          |      |
| Fair condition              | 1.10          | 0.86     | 1.40  | 1.42           | 1.22     | 1.65 |
| Poor condition              | 1.46          | 0.87     | 2.46  | 1.84           | 1.20     | 2.81 |
| Bad condition               | 3.39          | 1.07     | 10.77 | 1.81           | 0.35     | 9.30 |
| Volume of traffic           |               |          |       |                |          |      |
| Light                       | 1.08          | 0.66     | 1.78  | 1.34           | 0.86     | 2.09 |
| Moderate                    | 0.91          | 0.51     | 1.60  | 1.41           | 0.88     | 2.26 |
| Heavy                       | 1.04          | 0.49     | 2.22  | 1.72           | 1.04     | 2.85 |
| Litter in the street        |               |          |       |                |          |      |
| Some                        | 1.12          | 0.84     | 1.48  | 1.21           | 0.99     | 1.48 |
| Everywhere                  | 1.58          | 0.90     | 2.76  | 0.86           | 0.47     | 1.58 |
| Good area                   |               |          |       |                |          |      |
| Good                        | 1.36          | 1.08     | 1.72  | 1.15           | 0.97     | 1.38 |
| Average                     | 1.43          | 1.09     | 1.88  | 1.12           | 0.90     | 1.40 |
| Poor                        | 1.32          | 0.77     | 2.26  | 1.49           | 1.05     | 2.11 |
| Very poor                   | 2.04          | 1.17     | 3.57  | 1.65           | 1.07     | 2.53 |

<sup>A</sup>reference category: Never had asthma

**Table S5. Characteristics of children with transient or persistent asthma in sample (N=7,487)**

|                                      | Never | Transient | Persistent | Total |
|--------------------------------------|-------|-----------|------------|-------|
| Maternal education qualification     |       |           |            |       |
| Degree plus                          | 6.6   | 6.5       | 5.4        | 6.4   |
| Diploma                              | 37.4  | 33.1      | 33.0       | 36.4  |
| A levels                             | 16.9  | 16.7      | 15.7       | 16.7  |
| GCSE A-C                             | 25.6  | 28.4      | 27.1       | 26.1  |
| GCSE D-G                             | 5.6   | 8.1       | 7.7        | 6.1   |
| None                                 | 7.9   | 7.3       | 11.1       | 8.3   |
| Child's sex                          |       |           |            |       |
| Female                               | 50.9  | 46.5      | 43.3       | 49.4  |
| Maternal age at birth                |       |           |            |       |
| 14-24 years                          | 23.5  | 27.0      | 26.8       | 24.2  |
| Maternal ethnicity                   |       |           |            |       |
| Mixed                                | 0.8   | 0.4       | 0.6        | 0.7   |
| Indian                               | 1.9   | 1.0       | 1.8        | 1.8   |
| Pakistani                            | 3.2   | 1.6       | 3.7        | 3.1   |
| Black                                | 2.8   | 1.6       | 2.7        | 2.6   |
| Other                                | 1.4   | 1.2       | 0.8        | 1.3   |
| Maternal atopy                       |       |           |            |       |
| One                                  | 21.8  | 27.3      | 30.2       | 23.6  |
| Both                                 | 5.6   | 8.1       | 11.8       | 6.8   |
| Maternal pre-pregnancy BMI           |       |           |            |       |
| Underweight                          | 4.2   | 3.6       | 5.9        | 4.4   |
| Overweight                           | 25.3  | 29.3      | 26.2       | 25.7  |
| Obese                                | 12.2  | 13.9      | 16.7       | 13.0  |
| Breastfeeding at least 3 months      |       |           |            |       |
| Yes                                  | 73.9  | 76.6      | 77.4       | 74.6  |
| Child's birth weight                 |       |           |            |       |
| Healthy weight                       | 5.0   | 6.2       | 10.8       | 6.0   |
| Gestational age at birth             |       |           |            |       |
| Preterm                              | 5.5   | 10.1      | 11.0       | 6.7   |
| Maternal Smoking in pregnancy        |       |           |            |       |
| Yes                                  | 33.6  | 40.7      | 39.7       | 35.1  |
| Alcohol consumption during pregnancy |       |           |            |       |
| Any unit per week                    | 10.1  | 9.9       | 11.5       | 10.3  |
| Wheeze at 9 months                   |       |           |            |       |
| Yes                                  | 2.6   | 5.7       | 7.2        | 3.6   |
| Damp in the house                    |       |           |            |       |
| Yes                                  | 13.6  | 13.9      | 18.7       | 14.4  |
| Tenure                               |       |           |            |       |
| Own mortgage                         | 61.4  | 57.8      | 54.2       | 60.0  |
| Part rent/mortgage                   | 0.5   | 0.3       | 0.7        | 0.5   |
| Local authority                      | 15.4  | 18.3      | 20.1       | 16.3  |
| Housing association                  | 6.6   | 8.1       | 6.7        | 6.8   |
| Privately rented                     | 7.5   | 7.9       | 10.3       | 7.9   |

**Table S5. (continued) Prevalence of asthma by sample characteristics (N=7,487)**

|                             | Never | Transient | Persistent | Total |
|-----------------------------|-------|-----------|------------|-------|
| Living with parents         | 4.0   | 3.4       | 5.3        | 4.1   |
| Rent free                   | 0.9   | 2.2       | 1.0        | 1.0   |
| Furry pets                  |       |           |            |       |
| Yes                         | 40.9  | 43.7      | 40.0       | 41.0  |
| Environmental tobacco smoke |       |           |            |       |
| Yes                         | 17.7  | 18.2      | 18.0       | 17.8  |
| Garden access               |       |           |            |       |
| Yes, shared                 | 3.4   | 3.3       | 3.9        | 3.5   |
| No                          | 9.7   | 10.9      | 11.5       | 10.1  |
| Sibling number              |       |           |            |       |
| 1                           | 47.8  | 50.3      | 45.8       | 47.7  |
| 2 or more                   | 27.8  | 26.3      | 26.3       | 27.5  |
| Childcare                   |       |           |            |       |
| Formal                      | 14.3  | 11.7      | 12.7       | 13.9  |
| Condition of buildings      |       |           |            |       |
| Fair condition              | 37.1  | 38.5      | 44.1       | 38.3  |
| Poor condition              | 4.3   | 5.9       | 6.6        | 4.8   |
| Bad condition               | 0.3   | 0.9       | 0.4        | 0.4   |
| Volume of traffic           |       |           |            |       |
| Light                       | 75.4  | 77.3      | 75.0       | 75.5  |
| Moderate                    | 14.9  | 12.7      | 15.3       | 14.8  |
| Heavy                       | 4.7   | 5.0       | 6.0        | 5.0   |
| Litter in the street        |       |           |            |       |
| Some                        | 21.0  | 22.6      | 24.6       | 21.7  |
| Everywhere                  | 1.9   | 2.9       | 0.2        | 2.0   |
| Good area                   |       |           |            |       |
| Good                        | 38.2  | 40.6      | 39.2       | 38.6  |
| Average                     | 20.6  | 23.3      | 20.9       | 20.9  |
| Poor                        | 4.9   | 5.0       | 6.4        | 5.1   |
| Very poor                   | 2.4   | 3.8       | 3.3        | 2.6   |



**Table S6. Relative risk ratios (RRR) for asthma phenotype by SEC adjusted for blocks of mediators including mediators available at all time points (N=7,284)**

|                   | Baseline Model   |        |      | Model 1 |        |      | Model 2 |        |      | Model 3 |        |      | Model 4 |        |      |
|-------------------|------------------|--------|------|---------|--------|------|---------|--------|------|---------|--------|------|---------|--------|------|
|                   | RRR <sup>a</sup> | 95% CI |      | RRR     | 95% CI |      |
| Transient asthma  |                  |        |      |         |        |      |         |        |      |         |        |      |         |        |      |
| Diploma           | 0.85             | 0.61   | 1.18 | 0.79    | 0.57   | 1.09 | 0.78    | 0.56   | 1.08 | 0.78    | 0.56   | 1.08 | 0.77    | 0.55   | 1.08 |
| A levels          | 0.89             | 0.62   | 1.28 | 0.78    | 0.54   | 1.14 | 0.78    | 0.54   | 1.15 | 0.78    | 0.53   | 1.14 | 0.76    | 0.51   | 1.12 |
| GCSE A-C          | 1.00             | 0.68   | 1.48 | 0.83    | 0.55   | 1.23 | 0.80    | 0.53   | 1.19 | 0.80    | 0.53   | 1.19 | 0.77    | 0.52   | 1.16 |
| GCSE D-G          | 1.25             | 0.72   | 2.15 | 1.01    | 0.59   | 1.72 | 1.03    | 0.60   | 1.76 | 1.02    | 0.59   | 1.76 | 0.99    | 0.58   | 1.69 |
| None              | 0.94             | 0.57   | 1.57 | 0.75    | 0.44   | 1.30 | 0.72    | 0.41   | 1.27 | 0.72    | 0.41   | 1.28 | 0.69    | 0.40   | 1.21 |
| Persistent asthma |                  |        |      |         |        |      |         |        |      |         |        |      |         |        |      |
| Diploma           | 1.01             | 0.77   | 1.34 | 0.93    | 0.66   | 1.32 | 0.93    | 0.66   | 1.32 | 0.93    | 0.66   | 1.32 | 0.93    | 0.66   | 1.32 |
| A levels          | 1.04             | 0.75   | 1.45 | 0.93    | 0.61   | 1.40 | 0.92    | 0.61   | 1.39 | 0.93    | 0.61   | 1.41 | 0.93    | 0.61   | 1.41 |
| GCSE A-C          | 1.22             | 0.89   | 1.67 | 1.00    | 0.68   | 1.46 | 1.00    | 0.69   | 1.46 | 1.02    | 0.69   | 1.51 | 1.01    | 0.69   | 1.49 |
| GCSE D-G          | 1.48             | 0.93   | 2.35 | 1.17    | 0.65   | 2.11 | 1.18    | 0.65   | 2.14 | 1.19    | 0.66   | 2.16 | 1.17    | 0.65   | 2.12 |
| None              | 1.73             | 1.08   | 2.77 | 1.45    | 0.85   | 2.47 | 1.43    | 0.84   | 2.43 | 1.48    | 0.87   | 2.52 | 1.46    | 0.86   | 2.50 |

<sup>a</sup>All models were adjusted for baseline confounders (child sex, maternal age at birth, maternal ethnicity, and maternal atopy). Degree plus is the reference category.

Model 1: Baseline model + perinatal characteristics (maternal pre-pregnancy BMI; breastfeeding duration; birth weight; gestation; maternal smoking during pregnancy; alcohol use during pregnancy; wheeze at 9 months, 3 & 5 years)

Model 2: Model 1 + housing conditions (damp at 9 months, 3 & 5 years; tenure at 9 months, 3 & 5 years; furry pets at 9 months & 3 years; environmental tobacco smoke at 9 months, 3 & 5 years; access to garden at 9 months, 3 & 5 years)

Model 3: Model 2 + potential exposure to infection (sibling number at 9 months, 3 & 5 years; childcare type at 9 months & 3 years)

Model 4: Model 3 + neighbourhood characteristics (volume of traffic; housing quality; rubbish; area rating at 3 & 5 years)

**Table S7. Relative risk ratios (RRR) for transient and persistent asthma compared to never by SEC adjusted for blocks of mediators (N=7,487)**

|                                        | Baseline Model   |        |      | Model 1 |        |      | Model 2 |        |      | Model 3 |        |      | Model 4 |        |      | Model 5 |        |      |
|----------------------------------------|------------------|--------|------|---------|--------|------|---------|--------|------|---------|--------|------|---------|--------|------|---------|--------|------|
|                                        | RRR <sup>a</sup> | 95% CI |      | RRR     | 95% CI |      |
| Transient asthma                       |                  |        |      |         |        |      |         |        |      |         |        |      |         |        |      |         |        |      |
| Diploma                                | 0.86             | 0.62   | 1.19 | 0.81    | 0.58   | 1.12 | 0.82    | 0.59   | 1.13 | 0.81    | 0.58   | 1.12 | 0.79    | 0.56   | 1.10 | 0.78    | 0.55   | 1.09 |
| A levels                               | 0.93             | 0.65   | 1.34 | 0.83    | 0.57   | 1.21 | 0.84    | 0.58   | 1.22 | 0.82    | 0.57   | 1.19 | 0.79    | 0.54   | 1.15 | 0.76    | 0.52   | 1.12 |
| GCSE A-C                               | 1.01             | 0.69   | 1.47 | 0.87    | 0.59   | 1.27 | 0.89    | 0.60   | 1.31 | 0.85    | 0.57   | 1.26 | 0.81    | 0.55   | 1.20 | 0.77    | 0.52   | 1.15 |
| GCSE D-G                               | 1.26             | 0.74   | 2.14 | 1.09    | 0.65   | 1.85 | 1.15    | 0.67   | 1.96 | 1.08    | 0.64   | 1.83 | 1.03    | 0.61   | 1.74 | 0.96    | 0.57   | 1.63 |
| None                                   | 0.92             | 0.56   | 1.51 | 0.73    | 0.44   | 1.23 | 0.77    | 0.46   | 1.30 | 0.71    | 0.42   | 1.21 | 0.68    | 0.40   | 1.15 | 0.63    | 0.38   | 1.05 |
| Persistent asthma                      |                  |        |      |         |        |      |         |        |      |         |        |      |         |        |      |         |        |      |
| Diploma                                | 1.03             | 0.78   | 1.36 | 0.96    | 0.72   | 1.27 | 0.96    | 0.73   | 1.28 | 0.96    | 0.73   | 1.27 | 0.95    | 0.72   | 1.26 | 0.95    | 0.72   | 1.26 |
| A levels                               | 1.08             | 0.78   | 1.50 | 0.96    | 0.69   | 1.35 | 0.98    | 0.70   | 1.38 | 0.97    | 0.69   | 1.36 | 0.96    | 0.68   | 1.35 | 0.95    | 0.67   | 1.33 |
| GCSE A-C                               | 1.24             | 0.91   | 1.70 | 1.09    | 0.79   | 1.51 | 1.12    | 0.82   | 1.55 | 1.10    | 0.80   | 1.52 | 1.10    | 0.79   | 1.53 | 1.08    | 0.78   | 1.49 |
| GCSE D-G                               | 1.50             | 0.95   | 2.35 | 1.34    | 0.85   | 2.12 | 1.43    | 0.91   | 2.25 | 1.35    | 0.86   | 2.13 | 1.36    | 0.85   | 2.15 | 1.31    | 0.83   | 2.07 |
| None                                   | 1.71             | 1.07   | 2.74 | 1.35    | 0.86   | 2.12 | 1.44    | 0.92   | 2.26 | 1.35    | 0.86   | 2.10 | 1.37    | 0.87   | 2.16 | 1.31    | 0.82   | 2.09 |
| Proportion attenuated (%) <sup>b</sup> |                  |        |      | 50.70   |        |      | 38.03   |        |      | 50.70   |        |      | 47.89   |        |      | 56.34   |        |      |

<sup>a</sup> All models were adjusted for baseline confounders (child sex, maternal age at birth, maternal ethnicity, and maternal atopy). Degree plus is the reference category.

<sup>b</sup> Proportion of RRR of persistent asthma attenuated by comparison of baseline model with models 1-4 for lowest SECs ( $100 \times (\text{RRR-adjusted RRR}) / (\text{RRR}-1)$ )

Model 1: Baseline model + perinatal characteristics (maternal pre-pregnancy BMI; breastfeeding duration; birth weight; gestation; maternal smoking during pregnancy; alcohol use during pregnancy; wheeze

Model 2: Model 1 + environmental tobacco smoke

Model 3: Model 2 + housing conditions (damp; tenure; furry pets; access to garden)

Model 4: Model 3 + potential exposure to infection (sibling number; childcare type)

Model 5: Model 4 + neighbourhood characteristics (volume of traffic; housing quality; rubbish; area rating)

**Table S8. Relative risk ratios (RRR) for transient and persistent (two and three categorisations) asthma by SEC adjusted for blocks of mediators (N=7,487)**

|                             | <u>Baseline Model</u> |        |      | <u>Model 1</u> |        |      | <u>Model 2</u> |        |      | <u>Model 3</u> |        |      | <u>Model 4</u> |        |      |
|-----------------------------|-----------------------|--------|------|----------------|--------|------|----------------|--------|------|----------------|--------|------|----------------|--------|------|
|                             | RRR <sup>a</sup>      | 95% CI |      | RRR            | 95% CI |      |
| Transient asthma            |                       |        |      |                |        |      |                |        |      |                |        |      |                |        |      |
| Diploma                     | 0.86                  | 0.62   | 1.19 | 0.81           | 0.58   | 1.12 | 0.81           | 0.58   | 1.12 | 0.79           | 0.56   | 1.10 | 0.78           | 0.55   | 1.09 |
| A levels                    | 0.93                  | 0.65   | 1.34 | 0.83           | 0.57   | 1.21 | 0.82           | 0.57   | 1.19 | 0.79           | 0.54   | 1.15 | 0.76           | 0.52   | 1.12 |
| GCSE A-C                    | 1.01                  | 0.69   | 1.47 | 0.87           | 0.59   | 1.27 | 0.85           | 0.58   | 1.26 | 0.81           | 0.55   | 1.20 | 0.77           | 0.52   | 1.15 |
| GCSE D-G                    | 1.26                  | 0.74   | 2.14 | 1.09           | 0.65   | 1.85 | 1.08           | 0.64   | 1.83 | 1.03           | 0.61   | 1.74 | 0.96           | 0.57   | 1.63 |
| None                        | 0.92                  | 0.56   | 1.51 | 0.73           | 0.44   | 1.23 | 0.71           | 0.42   | 1.21 | 0.68           | 0.40   | 1.15 | 0.63           | 0.38   | 1.05 |
| Persistent asthma (twice)   |                       |        |      |                |        |      |                |        |      |                |        |      |                |        |      |
| Diploma                     | 0.99                  | 0.68   | 1.46 | 0.93           | 0.63   | 1.37 | 0.94           | 0.64   | 1.38 | 0.94           | 0.64   | 1.38 | 0.94           | 0.64   | 1.38 |
| A levels                    | 1.01                  | 0.64   | 1.61 | 0.94           | 0.58   | 1.50 | 0.95           | 0.59   | 1.52 | 0.96           | 0.59   | 1.54 | 0.94           | 0.59   | 1.51 |
| GCSE A-C                    | 1.13                  | 0.73   | 1.74 | 1.04           | 0.67   | 1.61 | 1.06           | 0.69   | 1.65 | 1.10           | 0.70   | 1.70 | 1.07           | 0.69   | 1.66 |
| GCSE D-G                    | 1.73                  | 1.00   | 2.99 | 1.64           | 0.94   | 2.87 | 1.73           | 0.99   | 3.03 | 1.80           | 1.02   | 3.17 | 1.73           | 0.99   | 3.05 |
| None                        | 1.57                  | 0.86   | 2.88 | 1.32           | 0.75   | 2.34 | 1.40           | 0.80   | 2.43 | 1.48           | 0.84   | 2.61 | 1.42           | 0.79   | 2.53 |
| Persistent asthma (3 times) |                       |        |      |                |        |      |                |        |      |                |        |      |                |        |      |
| Diploma                     | 1.08                  | 0.73   | 1.59 | 0.98           | 0.66   | 1.46 | 0.99           | 0.67   | 1.46 | 0.96           | 0.64   | 1.44 | 0.96           | 0.64   | 1.45 |
| A levels                    | 1.16                  | 0.74   | 1.80 | 0.99           | 0.63   | 1.56 | 0.99           | 0.63   | 1.57 | 0.96           | 0.60   | 1.52 | 0.95           | 0.59   | 1.52 |
| GCSE A-C                    | 1.37                  | 0.89   | 2.10 | 1.14           | 0.73   | 1.79 | 1.14           | 0.73   | 1.77 | 1.10           | 0.70   | 1.75 | 1.08           | 0.68   | 1.72 |
| GCSE D-G                    | 1.20                  | 0.57   | 2.51 | 1.00           | 0.47   | 2.12 | 0.96           | 0.45   | 2.02 | 0.93           | 0.44   | 1.97 | 0.90           | 0.42   | 1.91 |
| None                        | 1.87                  | 1.05   | 3.33 | 1.37           | 0.76   | 2.50 | 1.29           | 0.71   | 2.35 | 1.26           | 0.69   | 2.31 | 1.21           | 0.65   | 2.25 |

<sup>a</sup>All models were adjusted for baseline confounders (child sex, maternal age at birth, maternal ethnicity, and maternal atopy). Degree plus is the reference category.

Model 1: Baseline model + perinatal characteristics (maternal pre-pregnancy BMI; breastfeeding duration; birth weight; gestation; maternal smoking during pregnancy; alcohol use during pregnancy; wheeze

Model 2: Model 1 + housing conditions (damp; tenure; furry pets; environmental tobacco smoke; access to garden)

Model 3: Model 2 + potential exposure to infection (sibling number; childcare type)

Model 4: Model 3 + neighbourhood characteristics (volume of traffic; housing quality; rubbish; area rating)

**Table S9. Odds ratios (OR) for current asthma at 14 years (excluding prior reports) compared to none by SEC adjusted for blocks of mediators (N= 5,930)**

|                    | <u>Baseline Model</u> |        |      | <u>Model 1</u> |        |      | <u>Model 2</u> |        |      | <u>Model 3</u> |        |      | <u>Model 4</u> |        |      |
|--------------------|-----------------------|--------|------|----------------|--------|------|----------------|--------|------|----------------|--------|------|----------------|--------|------|
|                    | RRR <sup>a</sup>      | 95% CI |      | RRR            | 95% CI |      |
| Asthma at 14 years |                       |        |      |                |        |      |                |        |      |                |        |      |                |        |      |
| Diploma            | 0.94                  | 0.55   | 1.60 | 0.88           | 0.51   | 1.51 | 0.87           | 0.51   | 1.49 | 0.85           | 0.49   | 1.49 | 0.84           | 0.48   | 1.47 |
| A levels           | 0.70                  | 0.36   | 1.39 | 0.63           | 0.31   | 1.28 | 0.61           | 0.30   | 1.25 | 0.59           | 0.28   | 1.23 | 0.57           | 0.27   | 1.20 |
| GCSE A-C           | 0.50                  | 0.26   | 0.96 | 0.44           | 0.22   | 0.88 | 0.42           | 0.21   | 0.84 | 0.40           | 0.20   | 0.82 | 0.39           | 0.19   | 0.80 |
| GCSE D-G           | 1.19                  | 0.48   | 2.93 | 1.07           | 0.44   | 2.62 | 1.04           | 0.42   | 2.56 | 0.98           | 0.39   | 2.43 | 0.93           | 0.38   | 2.26 |
| None               | 0.87                  | 0.41   | 1.84 | 0.77           | 0.36   | 1.64 | 0.72           | 0.32   | 1.61 | 0.66           | 0.29   | 1.50 | 0.63           | 0.28   | 1.44 |

<sup>a</sup> All models were adjusted for baseline confounders (child sex, maternal age at birth, maternal ethnicity, and maternal atopy). Degree plus is the reference category.

<sup>b</sup> Current asthma at 14 years was defined by any report of asthma (yes/no) at 14 years only (excluding [n= 3,099] those who had reported asthma at 7 or 11 years)

Model 1: Baseline model + perinatal characteristics (maternal pre-pregnancy BMI; breastfeeding duration; birth weight; gestation; maternal smoking during pregnancy; alcohol use during pregnancy; wheeze

Model 2: Model 1 + housing conditions (damp; tenure; furry pets; environmental tobacco smoke; access to garden)

Model 3: Model 2 + potential exposure to infection (sibling number; childcare type)

Model 4: Model 3 + neighbourhood characteristics (volume of traffic; housing quality; rubbish; area rating)

**Table S10. Longitudinal typologies of wheeze**

| Longitudinal typologies of wheeze<br>0=no wheeze; 1=wheeze |                  |                                       |                         |                         |                         |              |
|------------------------------------------------------------|------------------|---------------------------------------|-------------------------|-------------------------|-------------------------|--------------|
| Typology #1<br>(analysis typology)                         | Typology #2      | 9m (taken to health prof. for wheeze) | 3y (wheeze in last 12m) | 5y (wheeze in last 12m) | 7y (wheeze in last 12m) | Frequency    |
| Never                                                      | Never            | 0                                     | 0                       | 0                       | 0                       | 66.0% (7540) |
| Early remitting                                            | Gone by seven    | 1                                     | 0                       | 0                       | 0                       | 3.14 (359)   |
| Early remitting                                            | Gone by seven    | 1                                     | 1                       | 0                       | 0                       | 1.05 (120)   |
| Early remitting                                            | Gone by seven    | 1                                     | 1                       | 1                       | 0                       | 0.54 (62)    |
| Early remitting                                            | Gone by seven    | 0                                     | 1                       | 0                       | 0                       | 8.7 (989)    |
| Early remitting                                            | Gone by seven    | 0                                     | 1                       | 1                       | 0                       | 3.7 (418)    |
| Persistent/relapsing                                       | Late onset >3    | 0                                     | 0                       | 1                       | 1                       | 2.9 (326)    |
| Persistent/relapsing                                       | Late onset >3    | 0                                     | 0                       | 0                       | 1                       | 2.9 (336)    |
| Persistent/relapsing                                       | Always           | 0                                     | 1                       | 1                       | 1                       | 3.82 (436)   |
| Persistent/relapsing                                       | Always           | 1                                     | 1                       | 1                       | 1                       | 0.56 (64)    |
| Persistent/relapsing                                       | Relapse by seven | 0                                     | 1                       | 0                       | 1                       | 1.3 (149)    |
| Persistent/relapsing                                       | Relapse by seven | 1                                     | 0                       | 0                       | 1                       | 0.3 (34)     |
| Persistent/relapsing                                       | Relapse by seven | 1                                     | 1                       | 0                       | 1                       | 0.2 (26)     |
| Persistent/relapsing                                       | Relapse by seven | 1                                     | 0                       | 1                       | 1                       | 0.2 (22)     |
| Transient/intermittent                                     | Transient        | 0                                     | 0                       | 1                       | 0                       | 4.4 (498)    |
| Transient/intermittent                                     | Intermittent     | 1                                     | 0                       | 1                       | 0                       | 0.3 (39)     |

<https://www.ncbi.nlm.nih.gov/pmc/articles/PMC4771620/>
